# Supplementary material for: Allergen alters IL‐2/αIL‐2‐based Treg expansion but not tolerance induction in an allergen‐specific mouse model
Source: PubMed Central journal article supplement (PMC7383865; doi:10.1111/all.14203), 2020-02-15
Supplement: ALL-75-1618-s001.pdf [file ALL-75-1618-s001.pdf]

# Supplemental figure 1

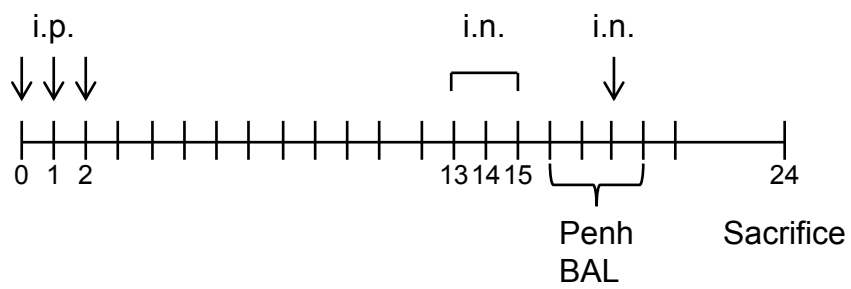

Day 0-2

1. PBS
2. PBS
3. IL-2/ $\alpha$ -IL-2
4. IL-2/ $\alpha$ -IL-2+MPE
5. MPE

Day 13-15

1. PBS
2. 450  $\mu$ g MPE
3. 450  $\mu$ g MPE
4. 450  $\mu$ g MPE
5. 450  $\mu$ g MPE
