# Supplementary material for: Allergen alters IL‐2/αIL‐2‐based Treg expansion but not tolerance induction in an allergen‐specific mouse model
Source: PubMed Central journal article supplement (PMC7383865; doi:10.1111/all.14203), 2020-02-15

# Supplemental Figure 3

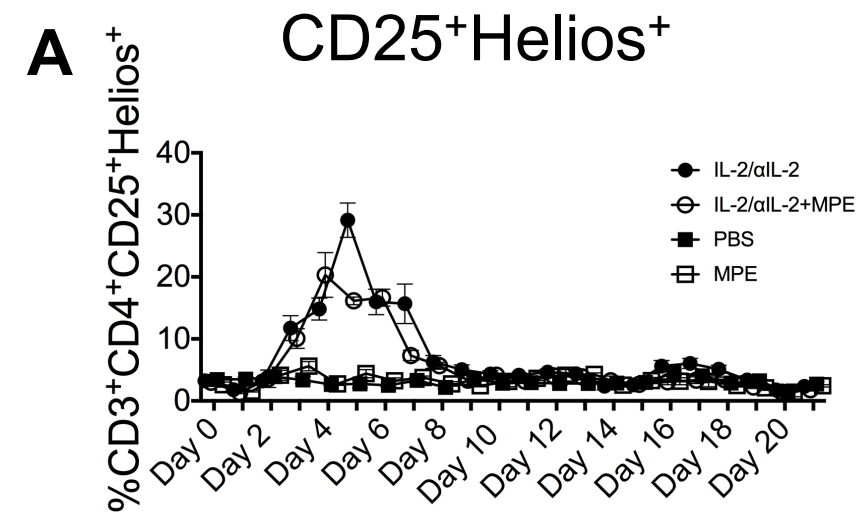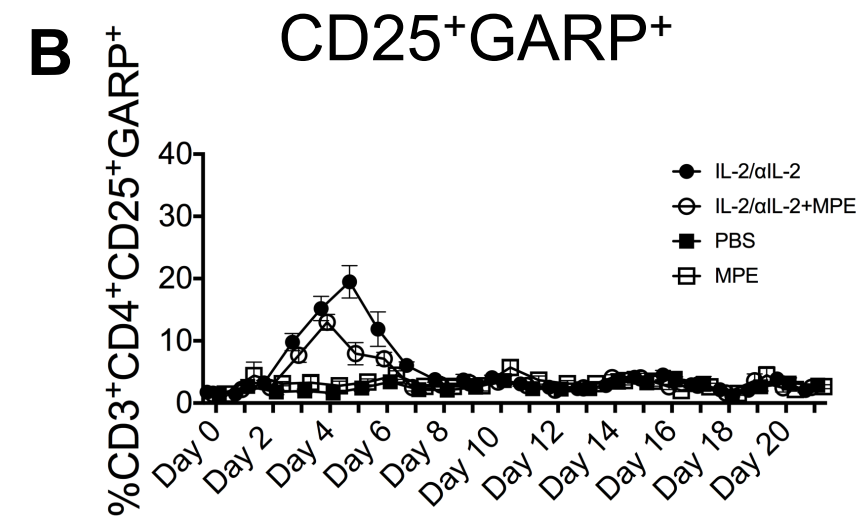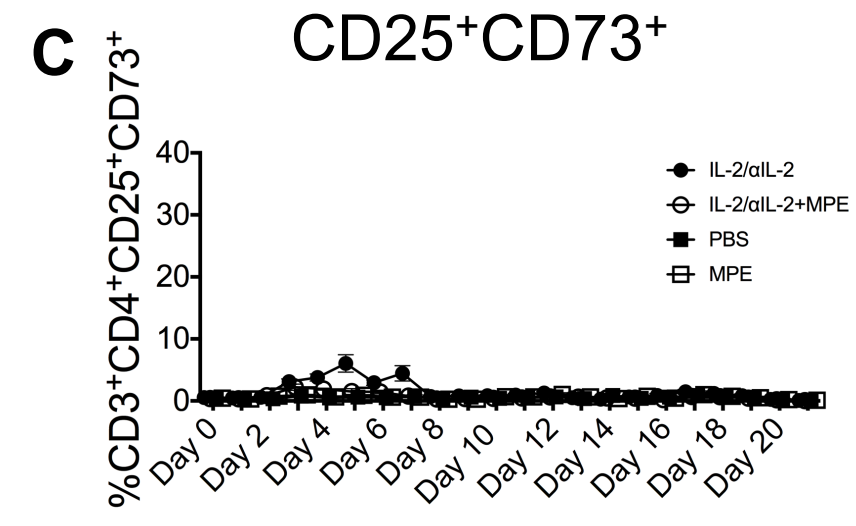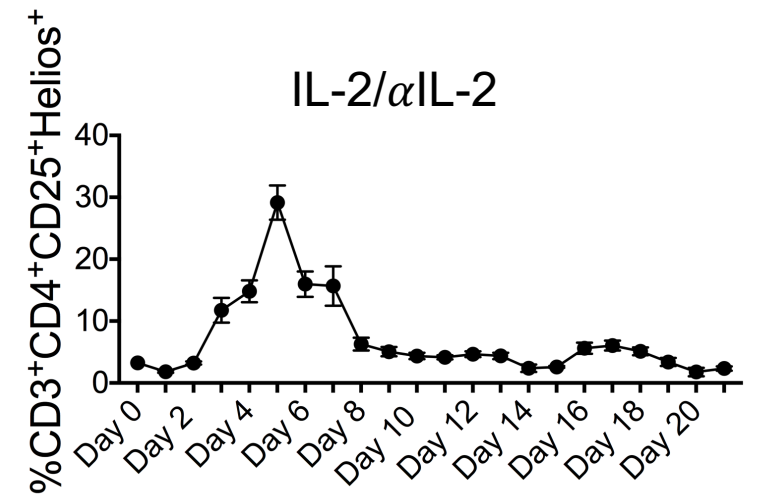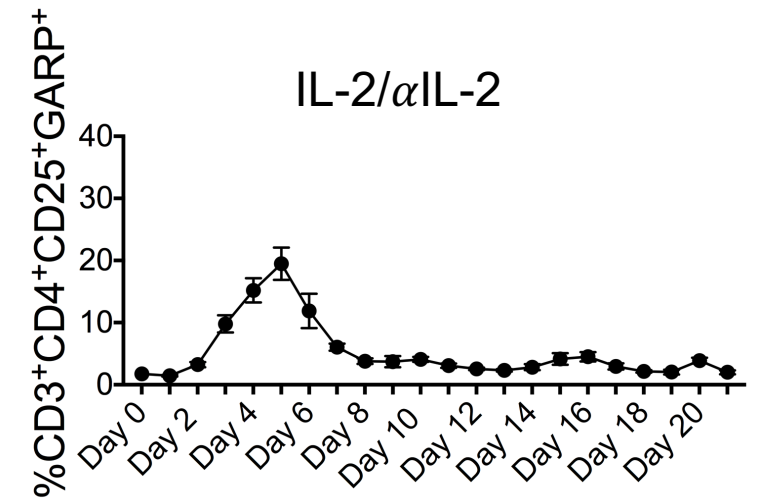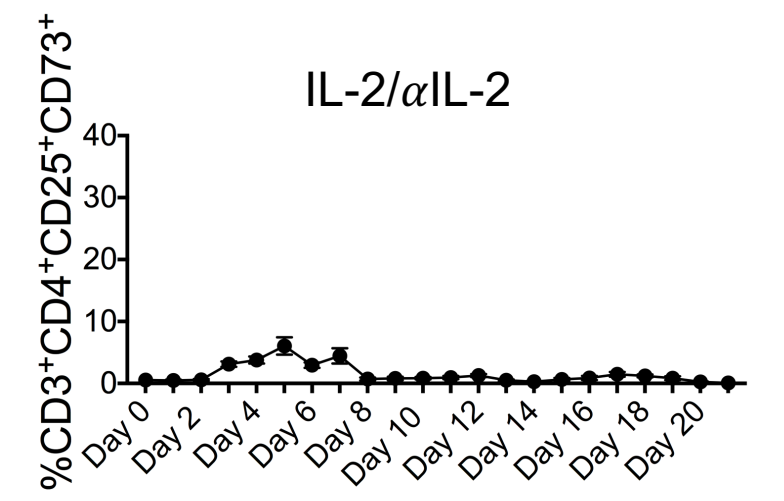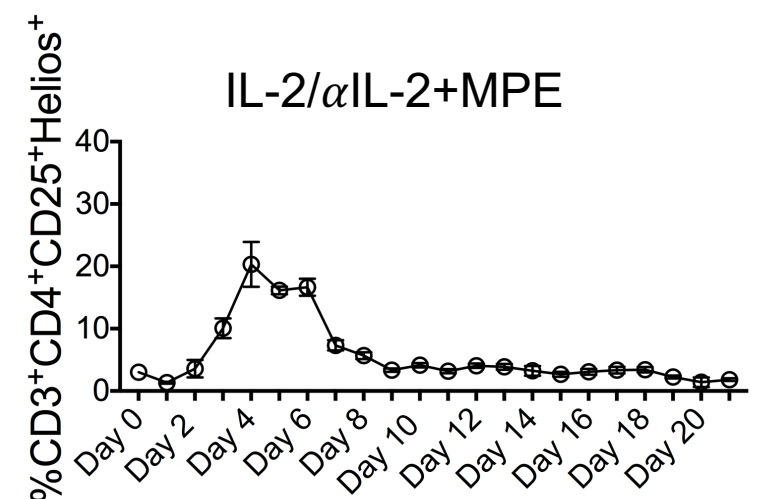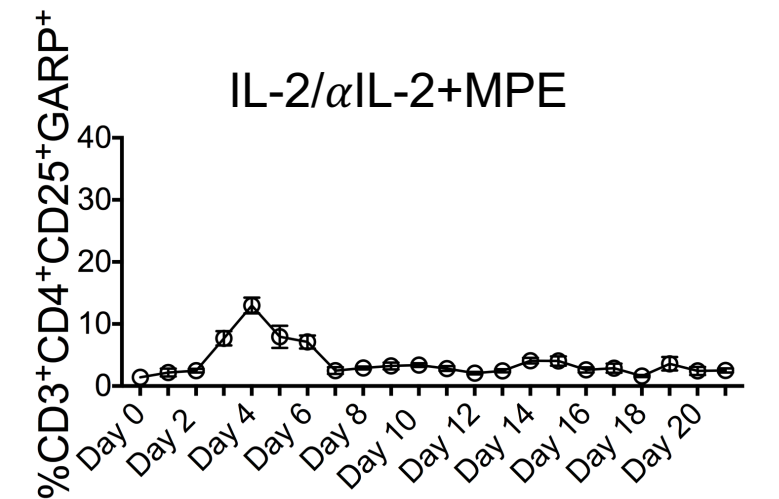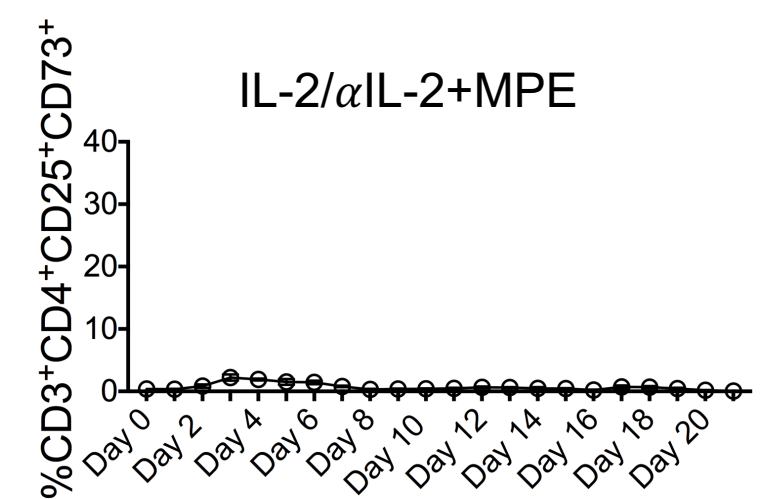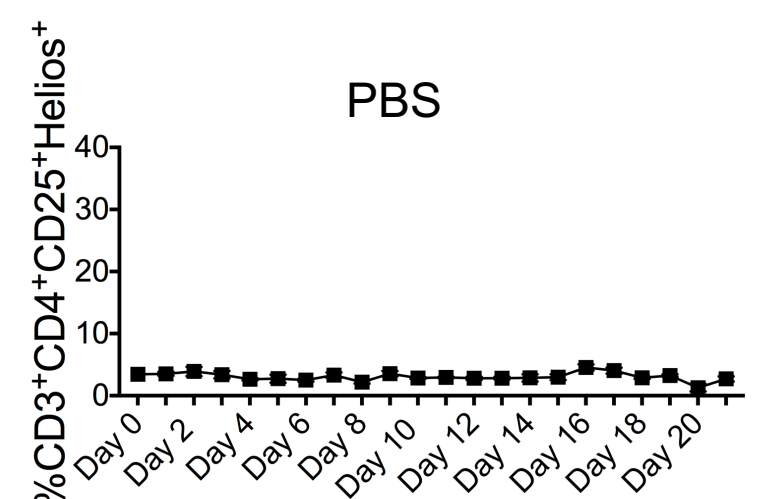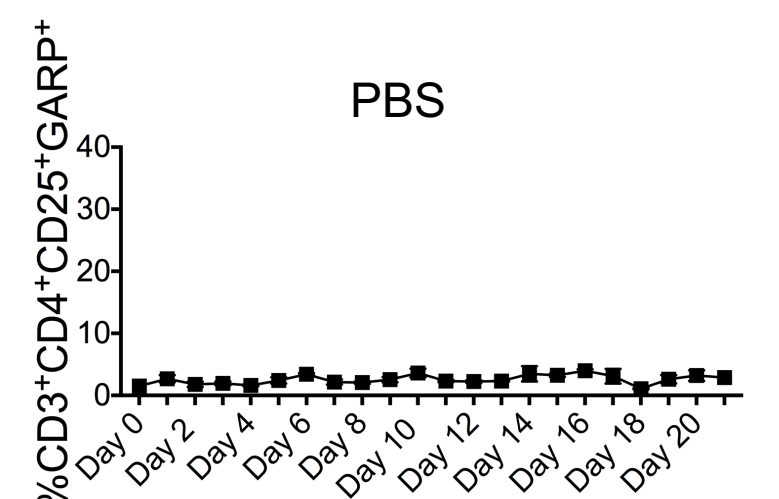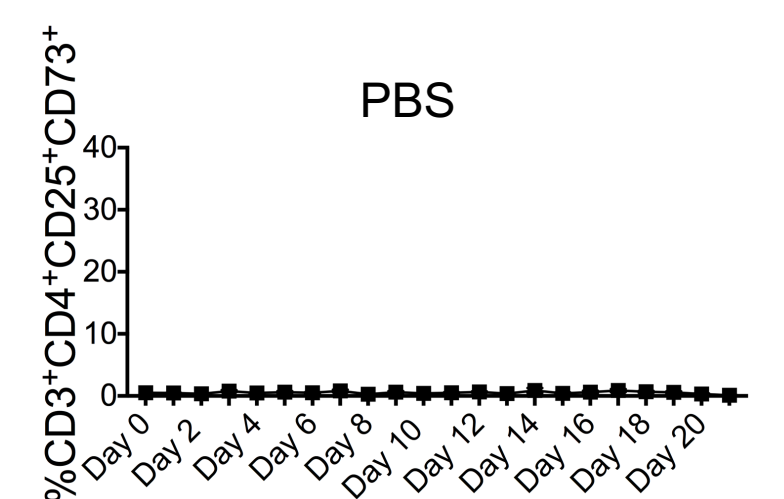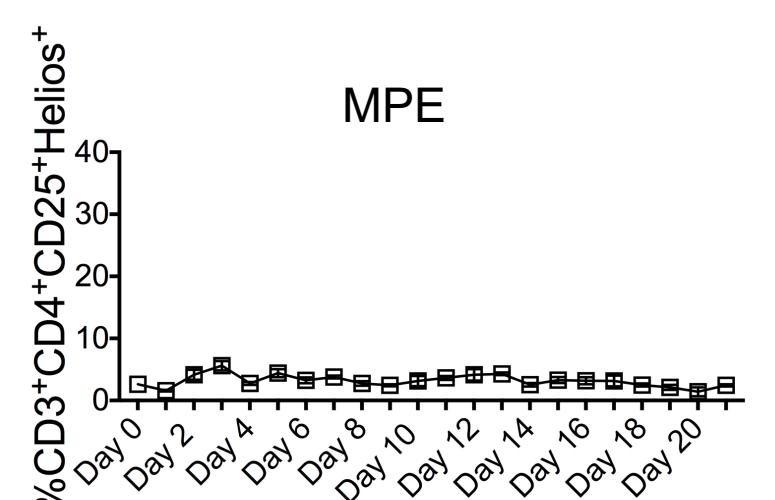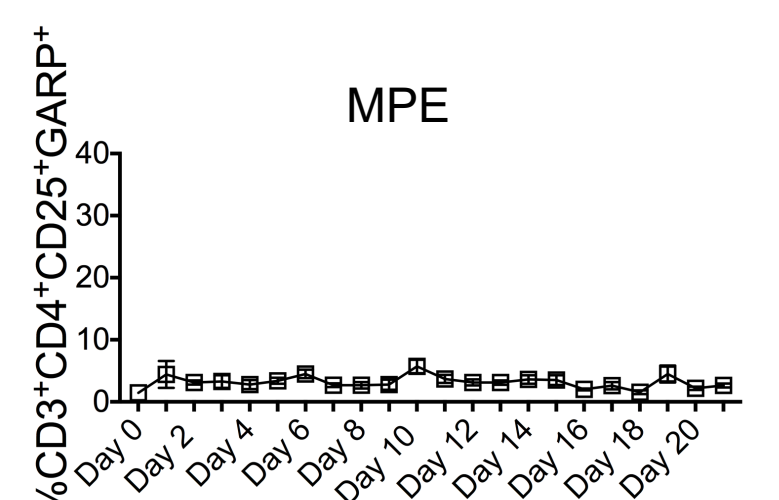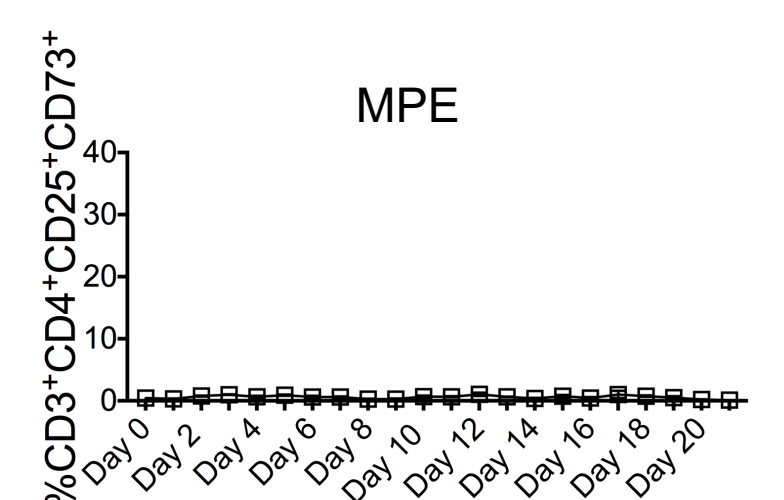

Supplement: ALL-75-1618-s003.pdf [file ALL-75-1618-s003.pdf]
